# Supplementary material for: A frequent somatic mutation in the 3′UTR of GAPDH facilitates the development of ovarian cancer by creating a miR-125b binding site
Source: PubMed Central journal article supplement — Oncol Rep. 2020 Jun 25;44(3):887–96. doi: 10.3892/or.2020.7663 (PMC7388293; doi:10.3892/or.2020.7663), 2020-06-25

Figure S1. Protein expression levels of GAPDH protein in OVCA tissue samples. (A) Western blotting was performed to detect GAPDH expression in 3 pairs of OVCA tissues (T) and their matching adjacent normal tissues (N).  $\beta$ -actin was used as the internal control. (B) Quantification of western blots. GAPDH, glyceraldehyde 3-phosphate dehydrogenase; OVCA, ovarian cancer.

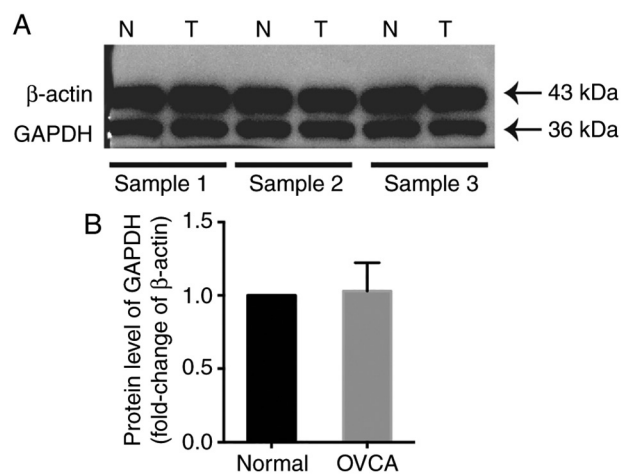

Figure S2. The expression of GAPDH and miR-125b in OVCA mutant tissues and OVCA wild-type tissues. (A) The abundance of GAPDH mutation (NM\_001289745.2:c.\*1325\_\*1326insC) in 11 OVCA mutant tissues. (B) mRNA expression levels of GAPDH in OVCA mutant (MUT) tissues, compared with OVCA wild-type (WT) tissues, n=11. (C) mRNA expression levels of miR-125b in OVCA MUT tissues, compared with OVCA WT tissues, n=11. OVCA, ovarian cancer; GAPDH, glyceraldehyde 3-phosphate dehydrogenase; T-GAPDH-WT, tumor tissues with wild-type GAPDH; T-GAPDH-MUT, tumor tissues with mutant GAPDH.

A

| Abundance of GAPDH mutation in 11 OVCA samples<br>(NM_001289745.2:c.*1325_*1326insC) |        |
|--------------------------------------------------------------------------------------|--------|
| 1                                                                                    | 0.41%  |
| 2                                                                                    | 10.67% |
| 3                                                                                    | 3.26%  |
| 4                                                                                    | 0.72%  |
| 5                                                                                    | 1.43%  |
| 6                                                                                    | 7.92%  |
| 7                                                                                    | 10.05% |
| 8                                                                                    | 8.34%  |
| 9                                                                                    | 1.32%  |
| 10                                                                                   | 7.48%  |
| 11                                                                                   | 9.44%  |

B

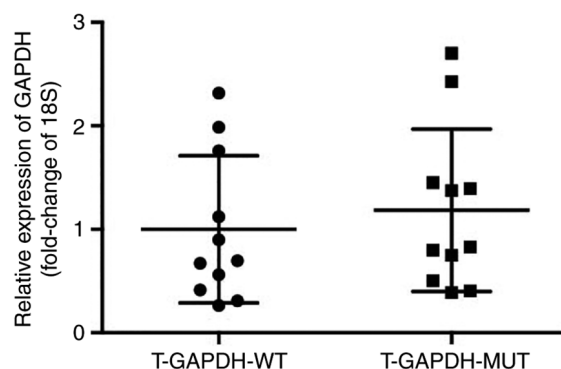

C

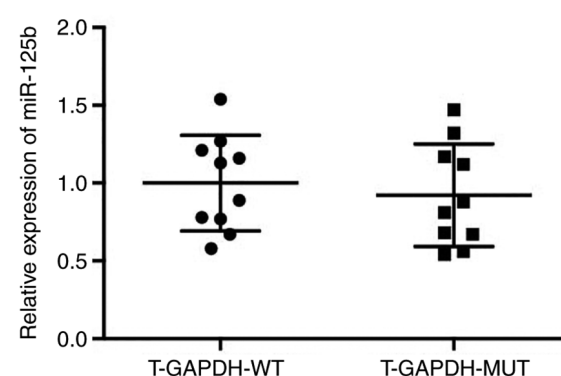

Supplement: Supplementary_Data1.pdf [file Supplementary_Data1.pdf]
